# Supplementary material
Source: MDPI journal article supplement (https://www.mdpi.com/2079-9276/10/8/86)
Supplement: s1 [file s1]

## Supplementary Materials

**Table S1.** Characteristics of the average values of selected indicators showing the climatic conditions of the studied cities in the vegetation season of 2019 <sup>1</sup>.

| Locality | Warsaw           |               | Szczecin    |               | Gorzów Wlkp. |               |
|----------|------------------|---------------|-------------|---------------|--------------|---------------|
|          | Climatic factors |               |             |               |              |               |
| Months   | Temperature      | Precipitation | Temperature | Precipitation | Temperature  | Precipitation |
|          | [med. °C]        | [mm]          | [med. °C]   | [mm]          | [med. °C]    | [mm]          |
| April    | 7.9              | 33            | 7.9         | 38            | 9.6          | 38            |
| May      | 13.3             | 53            | 12.9        | 50            | 14.3         | 52            |
| June     | 16.8             | 67            | 16.5        | 59            | 17.7         | 60            |
| July     | 18.2             | 71            | 18.0        | 65            | 19.7         | 70            |
| August   | 17.4             | 58            | 17.6        | 56            | 18.9         | 59            |

<sup>1</sup> <https://pl.climate-data.org/europa/polska/>.

**Table S2.** A set of data on the concentration of MMs in honeys from EU countries <sup>1</sup>.

| <b>Publications about MMs concentration in honeys from old countries of the EU</b>                                                                                                                                                                                                                                                                                                                                                                                                                                                                                                                                                                                                                                                                                                                                                                                                                                                                                                                                                                                                                          |
|-------------------------------------------------------------------------------------------------------------------------------------------------------------------------------------------------------------------------------------------------------------------------------------------------------------------------------------------------------------------------------------------------------------------------------------------------------------------------------------------------------------------------------------------------------------------------------------------------------------------------------------------------------------------------------------------------------------------------------------------------------------------------------------------------------------------------------------------------------------------------------------------------------------------------------------------------------------------------------------------------------------------------------------------------------------------------------------------------------------|
| Austria (Bibi et al., 2008), Finland (Zakhimzadeh and Lodenius 2000), France (Devillers et al., 2002; Millour et al., 2012; Saunier et al., 2013; Losfeld et al., 2014; Samarghandian et al., 2017), Greece (Ioannidou et al., 2005; Pohl, 2009; Krakowska et al., 2015; Fakhri et al., 2019), Spain (Rodríguez-Oter et al., 1995; Latorre et al., 1999; Terrah et al., 2004; Fernández-Torres et al., 2005; Terrah et al., 2005; López-García et al., 2007; Pisani et al., 2008; López-García et al., 2009; Alda-Garcilope et al., 2012; Krakowska et al., 2015; Bilandžić et al., 2017), Italy (Leita et al., 1996; Conti, 2000; Buldini et al., 2001; Pisani et al., 2008; Krakowska et al., 2015), Portugal (Silva et al., 2009; Bilandžić et al., 2017) Ireland (Downey et al., 2005; Pisani et al. 2008; Pohl, 2009), Germany (Barišić et al., 2002; Bibi et al., 2008; Siede et al., 2013; Fakhri et al., 2019).                                                                                                                                                                                     |
| <b>Publications about MMs concentration in honeys from new countries of the EU</b>                                                                                                                                                                                                                                                                                                                                                                                                                                                                                                                                                                                                                                                                                                                                                                                                                                                                                                                                                                                                                          |
| Bulgaria (Jivan et al., 2008; Yurukova et al., 2008; Zhelyazkova et al., 2010; Solayman et al., 2016; Fakhri et al., 2019), Croatia (Barišić et al., 2002; Bilandžić et al., 2014; Gašić et al., 2015; Bilandžić et al., 2017; Samarghandian et al., 2017), Czech Republic (Lachman et al., 2007; Pohl, 2009; Batelkova et al., 2012; Solayman et al., 2016), Lithuania (Matusevicius et al., 2010; Fakhri et al., 2019), Latvia (Vincevica-Gaile et al., 2012), Malta (Borg and Attard, 2020), Poland (Radwan, 1991; Jabłoński et al., 1995; Przybyłowski and Wilczyńska 2001; Piekut et al., 2004; Madejczyk and Baralkiewicz 2008; Chudzinska and Baralkiewicz 2010; Formicki et al., 2013; Staniak, 2014; Krakowska et al., 2015; Sitarz-Palczak et al., 2015), Romania (Matei et al., 2004; Pohl, 2009; Tudoreanu et al., 2012; Oroian et al., 2016), Slovakia (Kacaniová et al., 2009), Slovenia (Barišić et al., 2002; Golob et al., 2005; Pohl, 2009), Hungary (Fodor and Molnar 1993; Pisani et al., 2008; Czipa et al., 2015; Samarghandian et al., 2017; Conti et al., 2018; Bodó et al., 2020). |

- <sup>1</sup>: Alda-Garcilope, C., Gallego-Picó, A., Bravo-Yagüe, J.C., Garcinuño-Martínez, R.M., Fernández-Hernando, P., 2012. Characterization of spanish honeys with protected designation of origin „Miel de Granada” according to their mineral content. Food Chemistry, 135, 1785–1788.
- Barišić, D., Bromenshenk, J.J., Kezić, N., Vertačnik, A., 2002. The role of honey bees in environmental monitoring in Croatia. In: J. Devillers, Honey bees: estimating the environmental impact of chemicals. Taylor & Francis, Minh-Hà Pham-Delègue, 160–185, London-New York.
- Batelková, P., Borkovcová, I., Čelechovská, O., Vorlová, L., Bártaková, K., 2012. Polycycling aromatic hydrocarbons and risk elements in honey from the South Moravian Region (Czech Republic). Acta Veterinaria, 81, 169–174.
- Bibi, S., Husain, S.Z., Malik, R.N., 2008. Pollen analysis and heavy metals detection in honey samples from seven selected countries. Pakistan Journal of Botany, 40, 507–516.
- Bilandžić, N., Gačić, M., Đokić, M., Sedak I., Šipušić, Đ., Končurat, A., Tlak-Gajger, I., 2014. Major and trace elements levels in multifloral and unifloral honeys in Croatia. Journal of Food Composition and Analysis, 33, 132–138.

6. Bilandžić, N., Tlak-Gajger, I., Kosanović, M., Čalopek, B., Sedak, M., Kolanović, B.S., Varenina, I., Luburić, D.B., Varga, I., Đokić, M., 2017. Essential and toxic element concentrations in monofloral honeys from southern Croatia. *Food Chemistry*, 234, 245–253.
7. Bodó, A., Radványi, L., Kőszegi, T., Csepregi, R., Nagy, D.U., Farkas, A., Kocsis, M., 2020. Melissopalynology, antioxidant activity and multielement analysis of two types of early spring honeys from Hungary. *Food Bioscience*, 35, 100587.
8. Borg, D., Attard, E. 2020. Honeybees and their products as bioindicators for heavy metal pollution in Malta. *Acta Brasiliensis*, 4, 1, 60–69.
9. Buldini, P.L., Cavalli, S., Mevoli, A., Sharma, J.L., 2001. Iron chromatographic and voltammetric determination of heavy and transition metals in honey. *Food Chemistry*, 73(4), 487–495.
10. Chudzinska, M., Baralkiewicz, D., 2010. Estimation of honey authenticity by multielements characteristics using inductively coupled plasma-mass spectrometry (ICP-MS) combined with chemometrics. *Food & Chemical Toxicology*, 48, 1, 284–290.
11. Conti, M.E., 2000. Lazio region (central Italy) honeys: a survey of mineral content and typical quality parameters. *Food Control*, 11, 459–463.
12. Conti, M.E., Canepari, S., Finoia, M.G., Mele, G., Astolfi, M.L., 2018. Characterization of Italian multifloral honeys on the basis of their mineral content and some typical quality parameters. *Subtropical Plant Science*, 74, 102–113.
13. Czipa, N., Andrasi, D., Kovacs, B., 2015. Determination of essential and toxic elements in hungarian honeys. *Food Chemistry*, 175, 536–542.
14. Devillers, J., Dore, J., Marenco, M., Poirier-Duchene, F., Galand, N., Viel, C., 2002. Chemometrical analysis of 18 metallic and nonmetallic elements found in honeys sold in France. *Journal of Agricultural and Food Chemistry*, 50, 5998–6007.
15. Downey, G., Hussey, K., Jelly, J.D., Walshe, T.F., Martin, P.G., 2005. Preliminary contribution to the characterisation of artisanal honey produced on the island of Ireland by palynological and physicochemical data. *Food Chemistry*, 91, 347–354.
16. Fakhri, Y., Abtah, M., Atamaleki, A., Raoofi, A., Atabati, H., Asadi, A., Miri, A., Shamloo, E., Alinejad, A., Keramati, H., Khaneghah, A.M., 2019. The concentration of potentially toxic elements (PTEs) in honey: a global systematic review and meta-analysis and risk assessment. *Trends in Food Science & Technology*, 91, 498–506.
17. Fernández-Torres, R., Pérez-Bernal, J.L., Bello-López, M.A., Callejón-Mochón, M., Jiménez-Sánchez, J.C., Guiraúm-Pérez, A., 2005. Mineral content and botanical origin of spanish honeys. *Talanta*, 65, 686–691.
18. Fodor, P., Molnar, E., 1993. Honey as an environmental indicator: effect of sample preparation on trace element determination by ICP-AES. *Mikrochimica Acta*, 112, 113–118.
19. Formicki, G., Greń, A., Stawarz, R., Zyśk, B., Gał, A., 2013. Metal content in honey, propolis, wax, and bee pollen and implications for metal pollution monitoring. *Polish Journal of Environmental Studies*, 22(1), 99–106.
20. Gašić, U.M., Natić, M.M., Mišić, D.M., Lušić, D.V., Milojković-Opšenica, D.M., Tešić, T.L., Lušić, D.C., 2015. Chemical markers for the authentication of unifloral *Salvia officinalis* L. honey. *Journal of Food Composition and Analysis*, 44, 128–138.
21. Golob, T., Doberšek, U., Kump, P., Nečemer, M., 2005. Determination of trace and minor elements in slovenian honey by total reflection X-ray fluorescence spectroscopy. *Food Chemistry*, 91(4), 593–600.
22. Ioannidou, M.D., Zachariadis, G.A., Anthemidis, A.N., Stratis, J.A., 2005. Direct determination of toxic trace metals in honey and sugars using inductively coupled plasma atomic emission spectrometry. *Talanta*, 65(1), 92–97.
23. Jabłoński, B., Kołtowski, Z., Marcinkowski, J., Rybak-Chmielewska, H., Szczesna, T., Warakomska, Z., 1995. The content of heavy metals [Pb, Cd, and Cu] in nectar, honey and pollen from plants growing along communication routes. *Apiculturae Science of Exercise Books* 39(2), 129–144. (In Polish)
24. Jivan, A., Pătruica, S., Popescu, G., 2008. Researches concerning the heavy metal content of the rape honey originating from Batat area in the years 2006–2007. *SPASB* 41, 2, 302–308.
25. Kacaniová, M., Knazovická, V., Melich, M., Fikselova, M., Massanyi, P., Stawarz, R., Hascik, P., Pechociak, T., Kuczkowska, A., Putała, A., 2009. Environmental concentration of selected elements and relation to physicochemical parameters in honey. *Journal of Environmental Science and Health, Part A*, 44, 414–422.
26. Krakowska, A., Muszyńska, B., Reczyński, W., Opoka, W., Turski, W., 2015. Trace metal analyses in honey samples from selected countries. A potential use in bio-monitoring. *International Journal of Environmental Analytical Chemistry*, 95, 855–866.

27. Lachman, J., Koliňová, D., Míholová, D., Kořata, J., Titěra, D., Kult, K., 2007. Analysis of minority honey components: possible use for the evaluation of honey quality. *Food Chemistry*, 101(3), 973–979.
28. Latorre, M., Peña, R., Pita, C., Botana, A., García S., Herrero, C., 1999. Chemometric classification of honey according to their type. II Metal content data. *Food Chemistry*, 66, 263–268.
29. Leita, L., Míhlbachová, G., Cesco, S., Barbattini, R., Mondini, C., 1996. Investigation of the use of honey bees and honey bee products to assess heavy metals contamination. *Environmental Monitoring and Assessment*, 43(1), 1–9.
30. Losfeld, G., Saunier, J.-B., Grison, C. 2014. Minor and trace-elements in apiary products from a historical mining district (Les Malines, France). *Food Chemistry*, 146, 455–459.
31. López-García, I., Viñas, P., Romero-Romero, R., Hernández-Córdoba, M., 2007. Fast determination of phosphorus in honey, milk and infant formulas by electrothermal atomic absorption spectrometry using a slurry sampling procedure. *Spectrochimica Acta Part B*, 62, 48–55.
32. López-García, I., Viñas, P., Romero-Romero, R., Hernández-Córdoba, M., 2009. Analytical note preconcentration and determination of boron in milk, infant formula, and honey samples by solid phase extraction-electrothermal atomic absorption spectrometry. *Spectrochimica Acta, Part B*, 64, 2, 179–183.
33. Madejczyk, M., Baralkiewicz, D., 2008. Characterization of polish rape and honeydew honey according to their mineral contents using ICP-MS and F-AAS/AES. *Analytica Chimica Acta*, 617, 11–18.
34. Matei, N., Birghila, S., Dobrin, S., Capota, P., 2004. Determination of C vitamin and some essential trace elements (Ni, Mn, Fe, Cr) in bee products. *Acta Chimica Slovenica*, 51, 169–175.
35. Matusevicius, P., Staniskiene, B., Budreckiene, R., 2010. Metals and organochlorine compounds in Lithuanian honey. *Polish Journal of Food and Nutrition Sciences*, 60, 1–20.
36. Millour, S., Noe, L., Chekri, R., Vastel, C., Kadar, A., Sirot, V., Leblanc, J.-C., Guérin, T., 2012. Strontium, silver, tin, iron, tellurium, gallium, germanium, barium and vanadium levels in food stuffs from the Second French Total Diet. *Study Journal of Food Composition and Analysis*, 25, 108–129.
37. Oroian, M., Prisacaru, A., Hretcanu, E.C., Stroe, S.-G., Leahu, A., Buculei, A., 2016. Heavy metals profile in honey as a potential indicator of botanical and geographical origin. *International Journal of Food Properties*, 19, 8, 1825–1836.
38. Piekut, J., Borawska, M.H., Markiewicz, R., Hukalowicz, K., 2004. The contents of zinc and copper in relation to honey bee quality. In: *Metals in biology and medicine*, M.A. Ciser (eds.), I. Szikla, I. Laszlo, J.C. Esenne, Y. Maymord, J. Cewnter, L. Khassnova., P. Coblery. John Libbey Eurotext, 8, 239–242, Paris.
39. Pisani, A., Protano, G., Riccobono, F., 2008. Minor and trace elements in different honey types produced in Siena County (Italy). *Food Chemistry*, 107, 1553–1560.
40. Pohl, P., 2009. Determination of metal content in honey by atomic absorption and emission spectrometries. *Trends in Analytical Chemistry*, 28, 1, 117–128.
41. Przybyłowski, P., Wilczyńska, A., 2001. Honey as an environmental marker. *Food Chemistry*, 74, 289–291.
42. Radwan, S., 1991. Heavy metals in the natural environment. Wydawnictwo. Towarzystwa Wolnej Wszelchnicy Polskiej, Lublin. (in Polish)
43. Rodríguez-Oter, J.L., Paseiro, P., Simal, J., Terradillos, L., Cepeda, A., 1995. Silicon, phosphorus, sulphur, chlorine and ash contents of spanish commercial honeys. *Zeitschrift für Lebensmittel-Untersuchung und – Forschung*, 200, 233–234.
44. Samarghandian, S., Farkhondeh, T., Samini, F., 2017. Honey and health: a review of recent clinical research. *Pharmaceutical Research*, 9, 121–12.
45. Saunier, J.B., Losfeld, G., Freydier, R., Grison, C., 2013. Trace elements biomonitoring in a historical mining district (les Malines, France). *Chemosphere*, 93, 9, 2016–2023.
46. Siede, R., Dyrba, W., Augustin, T., Wiegand, A., Ellinghaus, R., 2013. Boron fertilizers in rape – a risk for honey bees? *Journal of Applied Entomology*, 137(9), 661–667.
47. Silva, L.R., Videira, R., Monteiro, A.P., Valentão, P., Andrade, P.B., 2009. Honey from Luso region (Portugal): Physicochemical characteristics and mineral contents. *Microchemical Journal*, 93, 73–77.
48. Sitarz-Palczak, E., Kalembkiewicz, J., Galas, D., 2015. Evaluation of the content of selected heavy metals in samples of polish honeys. *Journal of Ecological Engineering*, 16, 1–20.
49. Solayman, M., Islam, M.A., Paul, S., Ali, Y., Khalil, M.I., Alam, N., Gan, S.H., 2016. Physicochemical properties, minerals, trace elements, and heavy metals in honey of different origins. *Comprehensive Review in Food Science and Food Safety*, 15, 219–233.
50. Staniak, S., 2014. Sources and level of lead in food. *Polish Journal of Agronomy*, 19, 36–45. (in Polish)
51. Terrah, A., Recamales, A.F., Gonzales-Míret, M.I., Heredia, F.J., 2005. Contribution to the study of avocado honeys by their mineral contents using inductively coupled plasma optical emission spectrometry. *Food Chemistry*, 92, 305–309.

52. Terrah, A., Recamales, A.F., Hernanz, D., Heredia, F.J., 2004. Characterisation of spanish thyme honeys by their physicochemical characteristics and mineral contents. *Food Chemistry*, 88, 537–542.
53. Tudoreanu, L., Codreanu, M.D., Crivineanu, V., Goran, G.V., 2012. The quality of romanian honey varieties - mineral content and textural properties. *Bulletin USAMV serie 69* (1–2).
54. Vincevica-Gaile, A.Z., Klavins, M., Rudovica, V., Viksn, A., 2012. Potentially toxic metals in honey from Latvia: is there connection with botanical origin? *Recent Researches in Environment, Energy Systems and Sustainability*, 158–163.
55. Yurukova, L., Atanassova, J., Lazarova, M., 2008. Preliminary study on honeydew honey from the bulgarian market. *Comptes Rendus de l'Académie Bulgare des Sciences*, 61, 1433–1440.
56. Zakhimzadeh, K., Lodenius, M., 2000. Honey, pollen and bees as indicator of metal pollution. *Acta Universitatis Carolinae Environmetalica*, 14, 13–20.
57. Zhelyazkova, I., Atanasova, S., Barakova, V., Mihaylova, G. 2010. Content of heavy metals and metalloids in bees and bee products from areas with different degree of anthropogenic impact. *Agricultural Science and Technology*, 3, 1, 136–142.

**Table S3.** Honey MMs concentrations in the twenty-seven sites.

| Sites | MMs (mg/kg WW) |       |       |      |       |       |       |      |       |       |       |       |
|-------|----------------|-------|-------|------|-------|-------|-------|------|-------|-------|-------|-------|
|       | Mn             | Zn    | Cu    | Fe   | Sr    | Mg    | Ca    | K    | Na    | B     | P     | S     |
| 1     | 1.059          | 5.06  | 0.636 | 3.04 | 0.158 | 21.7  | 96.4  | 1626 | 59.37 | 4.35  | 58.9  | 58.9  |
| 2     | 0.292          | 2.14  | 0.330 | 2.40 | 0.179 | 14.8  | 59.2  | 1760 | 23.67 | 2.38  | 42.1  | 27.1  |
| 3     | 0.752          | 2.40  | 0.410 | 3.83 | 0.150 | 18.1  | 63.2  | 1610 | 18.36 | 8.94  | 55.9  | 66.3  |
| 4     | 0.528          | 2.55  | 0.455 | 4.26 | 0.240 | 32.3  | 86.5  | 1543 | 20.51 | 3.86  | 116.4 | 50.2  |
| 5     | 0.466          | 5.05  | 0.217 | 3.33 | 0.101 | 14.5  | 97.2  | 326  | 14.59 | 14.71 | 51.7  | 31.4  |
| 6     | 0.426          | 3.65  | 0.310 | 3.31 | 0.077 | 16.3  | 68.3  | 391  | 15.78 | 10.88 | 69.5  | 35.4  |
| 7     | 3.764          | 12.80 | 0.582 | 5.32 | 0.333 | 71.7  | 157.9 | 2563 | 55.94 | 10.25 | 321.6 | 110.4 |
| 8     | 0.416          | 2.53  | 0.161 | 3.37 | 0.285 | 20.7  | 140.2 | 1627 | 17.96 | 3.14  | 64.5  | 32.1  |
| 9     | 1.835          | 2.66  | 0.826 | 9.73 | 0.477 | 109.3 | 200.2 | 3490 | 26.41 | 9.91  | 405.1 | 130.8 |
| 10    | 0.326          | 2.85  | 0.257 | 3.38 | 0.187 | 30.0  | 94.7  | 1564 | 11.32 | 4.17  | 139.7 | 37.6  |
| 11    | 3.283          | 2.87  | 0.443 | 2.03 | 0.057 | 23.2  | 49.7  | 843  | 21.84 | 5.01  | 121.6 | 50.1  |
| 12    | 1.654          | 2.72  | 0.420 | 2.42 | 0.139 | 33.9  | 89.8  | 1585 | 21.26 | 4.71  | 156.3 | 47.7  |
| 13    | 0.771          | 3.02  | 0.227 | 1.14 | 0.024 | 20.4  | 28.0  | 625  | 11.98 | 3.42  | 88.5  | 26.0  |
| 14    | 0.670          | 3.13  | 0.080 | 1.43 | 0.048 | 16.7  | 73.1  | 413  | 12.98 | 10.83 | 52.7  | 27.6  |
| 15    | 0.105          | 3.00  | 0.106 | 1.01 | 0.029 | 7.0   | 31.6  | 430  | 28.40 | 4.13  | 64.1  | 35.0  |
| 16    | 0.120          | 1.97  | 0.047 | 1.78 | 0.027 | 6.8   | 29.0  | 402  | 2.98  | 4.11  | 57.0  | 17.8  |
| 17    | 0.130          | 3.54  | 0.097 | 1.52 | 0.101 | 14.2  | 51.0  | 1844 | 8.81  | 4.38  | 66.4  | 27.1  |
| 18    | 0.166          | 5.92  | 0.114 | 1.36 | 0.160 | 13.8  | 75.3  | 1602 | 10.78 | 3.65  | 72.2  | 26.9  |
| 19    | 0.222          | 5.44  | 0.165 | 1.75 | 0.150 | 20.0  | 88.1  | 1723 | 8.39  | 3.21  | 83.0  | 30.6  |
| 20    | 0.207          | 3.14  | 0.141 | 1.23 | 0.124 | 14.7  | 57.8  | 1735 | 8.72  | 2.92  | 72.8  | 26.6  |
| 21    | 0.223          | 3.76  | 0.159 | 1.40 | 0.128 | 16.9  | 76.9  | 1274 | 10.64 | 3.21  | 82.9  | 27.9  |
| 22    | 0.294          | 3.13  | 0.238 | 1.21 | 0.050 | 11.5  | 50.5  | 706  | 6.94  | 3.23  | 71.6  | 32.1  |
| 23    | 0.226          | 3.39  | 0.176 | 1.16 | 0.047 | 10.0  | 44.2  | 733  | 4.28  | 4.76  | 87.0  | 30.0  |
| 24    | 0.672          | 4.70  | 0.497 | 2.51 | 0.083 | 20.9  | 72.6  | 1501 | 7.72  | 6.30  | 106.2 | 56.7  |
| 25    | 0.384          | 3.70  | 0.263 | 1.63 | 0.072 | 16.7  | 55.2  | 783  | 4.96  | 5.59  | 114.6 | 38.5  |
| 26    | 0.466          | 3.34  | 0.319 | 1.74 | 0.070 | 19.8  | 64.4  | 1009 | 6.11  | 6.79  | 122.8 | 44.9  |
| 27    | 0.363          | 4.22  | 0.067 | 2.39 | 0.078 | 12.6  | 77.5  | 166  | 2.99  | 10.40 | 65.8  | 23.6  |

**Table S4.** Average annual values of dusts and their concentration of metalloid and HMs in three selected EU countries (Vienna <sup>1</sup>, Brno <sup>2,3</sup>, Göttingen <sup>4</sup>) with a similar number of inhabitants as in the analyzed cities in Poland.

| Cities    | Dusts              |       | Metalloid and HMs in dusts |                    |          |          |
|-----------|--------------------|-------|----------------------------|--------------------|----------|----------|
|           | PM10               | PM2.5 | As(PM10)                   | Cd(PM10)           | Ni(PM10) | Pb(PM10) |
|           | mg/dm <sup>3</sup> |       |                            | µg/dm <sup>3</sup> |          |          |
| Vienna    | 20.0               | 14.0  | 0.3                        | 0.3                | 0.6      | 2.0      |
| Brno      | 24.4               | 16.7  | 0.7*; 0.5                  | 0.1; 0.2           | 0.6; 1.4 | 4.4, 5.1 |
| Göttingen | 19.0               | 11.0  | 0.52                       | 0.10               | 1.55     | 3.4      |

\*: the number of published results is related to the different frequency of measurements in air monitoring for individual cities.

<sup>1</sup>: IG-L Annual Report Vienna, 2019. Annual report 2019, Air quality measurements by the environmental protection department of the city of Vienna in accordance with the immission control Act-Air MA 22 – 376947/2020 July 1, 2020, Vienna, 74. <https://www.wien.gv.at/umwelt/luft/pdf/luftguete-2019.pdf> (In German).

<sup>2, 3</sup>: Škáchová, H., Vlasáková, L., Sedláková, K., 2019. Air quality in the Czech Republic in 2019. Preliminary assessment, Part 1. Evaluation of concentrations of PM10, PM2.5, O<sub>3</sub>, NO<sub>2</sub>, SO<sub>2</sub> and CO. Czech Hydrometeorological Institute (ČHMÚ), Prague-Komorany, (In Czech); Brzezina, J., 2018. Measurement of air quality during the Brno fireworks show Ignis Brunensis 2018, Part 3. Czech Hydrometeorological Institute. <https://chmibrno.org/blog/2018/11/06/mereni-kvality-ovzdusi-behem-brnenske-prehličky-ohnostroju-ignis-brunensis-2018-3-díl/> (In Czech).

<sup>4</sup>: AQM, 2019. Air Quality Monitoring (AQM) in Lower Saxony, Annual Report 2019. State Trade Inspectorate Hildesheim, Central Support Office for Air Quality Control, Noise, Hazardous Substances and Incident Prevention - ZUS LLGS, 88. file:///C:/Users/wksir/Downloads/Jahresbericht-2019.pdf. (In German)

**Table S5.** Firework emission<sup>1</sup> trace based on the Pb/element ratio in the tested honeys from Gorzów Wlkp. and Szczecin.

| MMs | Cities       |                   |            |                    |
|-----|--------------|-------------------|------------|--------------------|
|     | Gorzów Wlkp. |                   | Szczecin   |                    |
|     | Pb/element   | 1 site [mg/kg WW] | Pb/element | 4 sites [mg/kg WW] |
| Ca  | 850          | 200.2             | 1225       | 76.3               |
| Mn  | 8            | 1.835             | 11         | 0.658              |
| K   | 14813        | 3490              | 1225       | 1635               |
| Zn  | 11           | 2.659             | 49         | 3.040              |
| Cu  | 4            | 0.826             | 7          | 0.458              |
| Fe  | 41           | 9.727             | 54         | 3.382              |
| Na  | 112          | 26.41             | 489        | 30.48              |
| Pb  | 1            | 0.236             | 1          | 0.062              |
| Cr  | 0.112        | 0.026             | 0          | 0.000              |
| B   | 42           | 9.914             | 78         | 4.883              |
| Sr  | 2            | 0.477             | 3          | 0.182              |
| P   | 1719         | 405.1             | 1096       | 68.3               |
| Mg  | 464          | 109.3             | 349        | 21.7               |
| Ba  | 1.2          | 0.293             | 0.1        | 0.003              |
| S   | 555          | 130.8             | 812        | 50.6               |

<sup>1</sup>: Pongpiachan, S.; Iijima, A.; Cao, J. Hazard Quotients, Hazard Indexes, and Cancer Risks of Toxic Metals in PM10 during Firework Displays. *Atmosphere* **2018**, *9*, 144.

**Table S6.** The rank order of HMs in honeys from Poland and neighbors countries from UE (mg/kg WW).

| Countries                    | HMs                                           |
|------------------------------|-----------------------------------------------|
| Poland <sup>MD</sup>         | Fe (9.70) > Mn (5.40) > Zn (5.01) > Cu (1.21) |
| Germany <sup>MD</sup>        | Fe (6.30) > Zn (0.47) > Cu (0.16) > Mn (0.14) |
| Czech Republic <sup>MD</sup> | Mn (1.16) > Zn (0.40) > Cu (0.11) > Fe (0.02) |
| Lithuania <sup>MD</sup>      | Zn (1.24) > Cu (0.21)                         |
| Slovakia <sup>MD</sup>       | Cu (0.39)                                     |
| UE <sup>MD</sup>             | Fe (8.36) > Zn (3.60) > Mn (2.66) > Cu (0.96) |
| Poland <sup>PS</sup>         | Zn (3.80) > Fe (2.58) > Mn (0.73) > Cu (0.29) |

<sup>PS</sup>: Present studies; <sup>MD</sup>: Metadata on the Table S2.

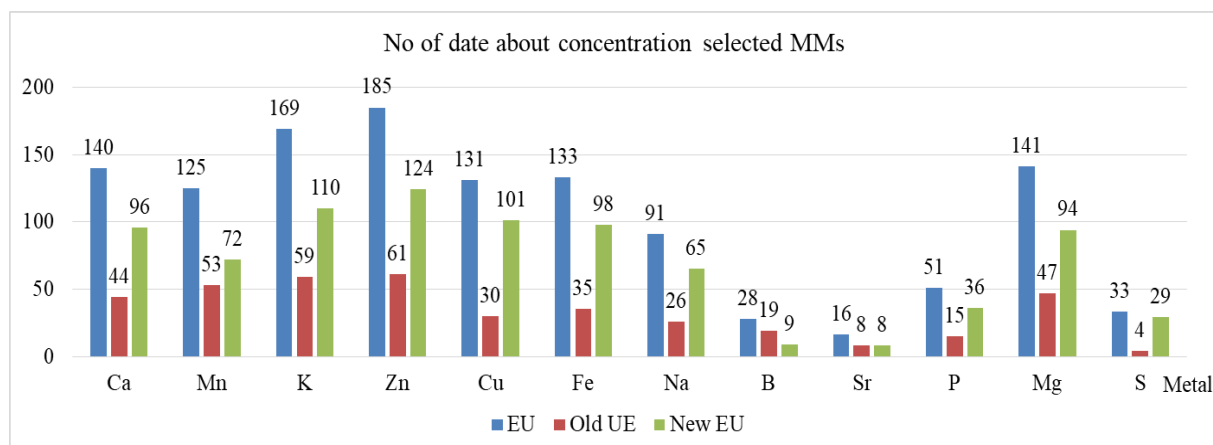

**Figure S1.** A set of data on the concentration of MMs in honeys coming from new and old EU countries.

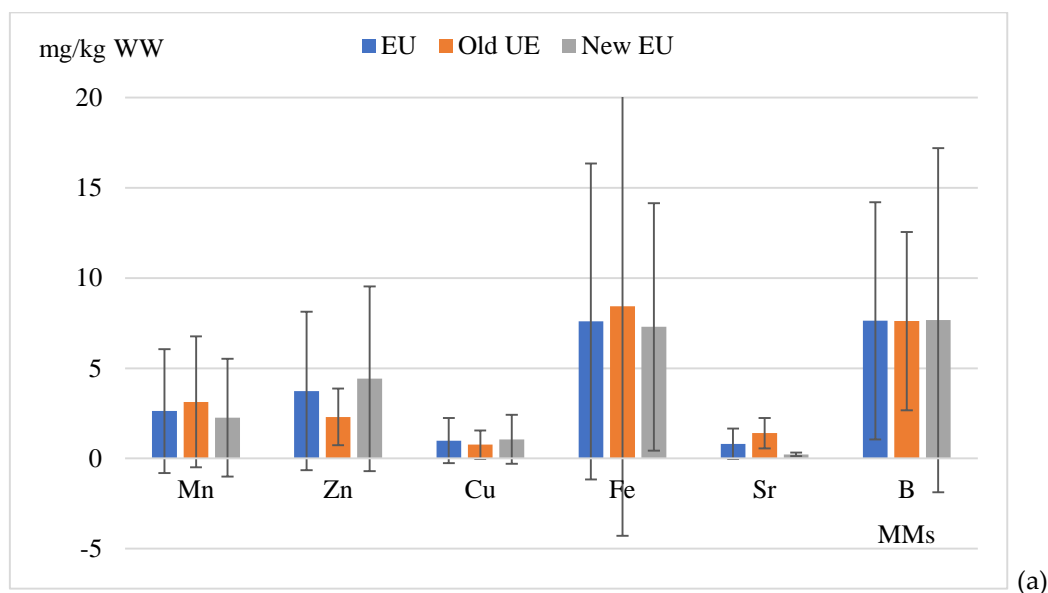

(a)

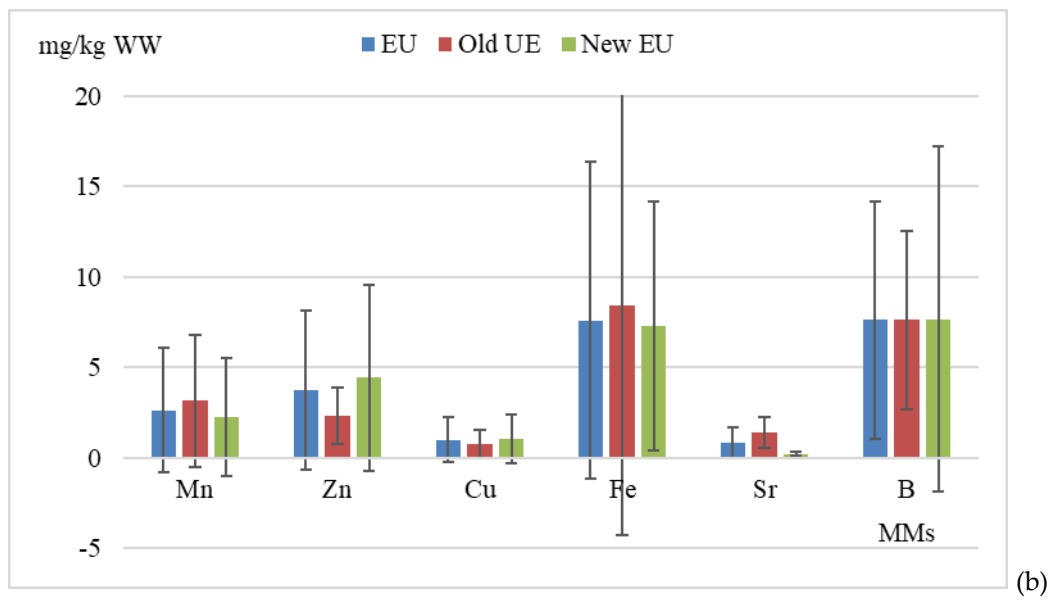

**Figure S2.** Mean concentration of MMs: macro- (a) and microelements (b) in honeys from new and old EU countries.
